# Supplementary material for: Pleiotropic Effects of APOB Variants on Lipid Profiles, Metabolic Syndrome, and the Risk of Diabetes Mellitus
Source: MDPI journal article supplement (doi:10.3390/ijms232314963), 2022-11-29
Supplement: s1 [file s1]

## Supplementary Method

### *Definitions of metabolic syndrome and diabetes mellitus*

Diabetes mellitus (DM) was defined as a fasting plasma glucose level of  $\geq 126$  mg/dL, a glycohemoglobin value of  $\geq 6.5\%$ , or a self-reported history of DM. Because medication histories were unavailable, metabolic syndrome characteristics were based on the recent update of the third report of the National Cholesterol Education Program's Adult Treatment Panel III criteria [1] with modifications. Participants with three or more of the following attributes are typically defined as having metabolic syndrome: (1) BP of  $\geq 130/85$  mmHg or a history of hypertension; (2) triglyceride level of  $\geq 150$  mg/dL; (3) high-density lipoprotein cholesterol level of  $< 40$  mg/dL for men or  $< 50$  mg/dL for women; (4) fasting plasma glucose of  $\geq 100$  mg/dL or a history of DM; and (5) waist circumference of  $> 90$  cm for men or  $> 80$  cm for women.

### Reference:

1. Grundy SM, Cleeman JI, Daniels SR, Donato KA, Eckel RH, Franklin BA, et al. Diagnosis and management of the metabolic syndrome: an American Heart Association/National Heart, Lung, and Blood Institute Scientific Statement. *Circulation*. 2005; 11: 2735–52.

**Supplementary Table S1.** *APOB* exonic mutations in Taiwan Biobank participants:  
Data derived from the whole genome sequence.

| Chr | SNPs        | Position<br>(GRCh37) | Ref/Alt | HWE    | MAF    | Exon<br>number | Exonic Function         | mRNA<br>sequence | AA Change.   | LDL cholesterol |        |                       |
|-----|-------------|----------------------|---------|--------|--------|----------------|-------------------------|------------------|--------------|-----------------|--------|-----------------------|
|     |             |                      |         |        |        |                |                         |                  |              | Beta            | se     | <i>p</i> value        |
| 2   | rs144467873 | 21229161             | G/A     | 0.2916 | 0.0019 | 26             | Non-synonymous mutation | c.C10579T        | p.Arg3527Trp | 0.1862          | 0.047  | $7.75 \times 10^{-5}$ |
| 2   | rs676210    | 21231524             | A/G     | 0.6796 | 0.2732 | 26             | Non-synonymous mutation | c.C82169T        | p.Pro2739Leu | -0.0062         | 0.005  | 0.2105                |
| 2   | rs679899    | 21250914             | A/G     | 0.2891 | 0.1482 | 14             | Non-synonymous mutation | c.C1853T         | p.Ala618Val  | -0.0009         | 0.006  | 0.8827                |
| 2   | rs13306194  | 21252534             | G/A     | 0.0494 | 0.1425 | 12             | Non-synonymous mutation | c.C1594T         | p.Arg532Trp  | -0.0112         | 0.0065 | 0.0839                |
| 2   | rs1367117   | 21263900             | G/A     | 0.8006 | 0.1320 | 4              | Non-synonymous mutation | c.C293T          | p.Thr98Ile   | 0.0091          | 0.0064 | 0.1544                |

Chr: chromosome, SNP: single nucleotide polymorphism, Ref/Alt: reference/alternate allele, HWE: Hardy-Weinberg equilibrium, MAF: minor allele frequency, mRNA: messenger RNA, AA: amino acid, se: standard error.

Participants were analyzed after the exclusion of those with a history of hyperlipidemia.

*p* value: adjusted for sex, age, BMI and current smoking.

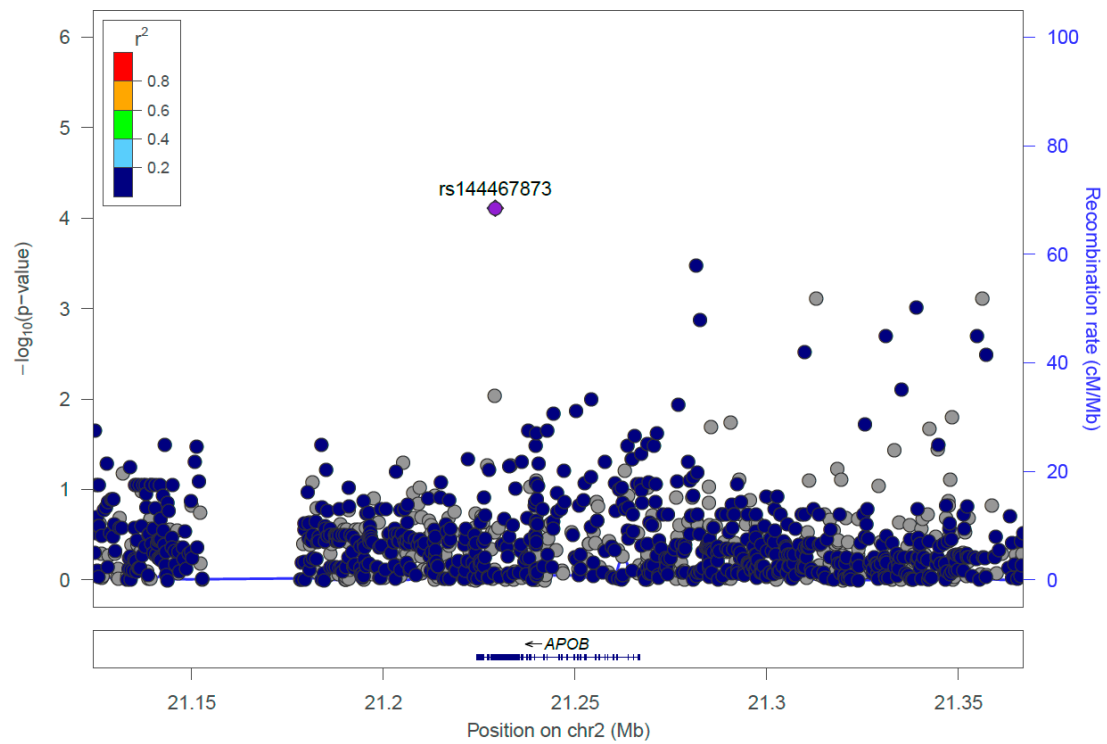

**Supplementary Figure S1.** Regional association analysis between *APOB* variants and LDL cholesterol levels in Taiwan Biobank participants with whole genomic sequence data.

**Supplementary Table S2.** Association between *APOB* locus non-coding variants and serum lipid profile and metabolic syndrome.

| Genetic variants            | Genotypes             |                       |                       | Beta    | se     | p value                |
|-----------------------------|-----------------------|-----------------------|-----------------------|---------|--------|------------------------|
| <i>APOB</i> rs35131127      | TT (88,660)           | TC (16,879)           | CC (777)              |         |        |                        |
| Total cholesterol (mg/dL)   | 193.0 (171.0 - 217.0) | 194.0 (172.0 - 218.0) | 197.0 (175.0 - 219.0) | 0.0029  | 0.0006 | $7.31 \times 10^{-7}$  |
| LDL cholesterol (mg/dL)     | 119.0 (99.0 - 140.0)  | 120.0 (101.0 - 142.0) | 124.0 (103.0 - 144.0) | 0.0048  | 0.0009 | $4.82 \times 10^{-8}$  |
| Non-HDL cholesterol (mg/dL) | 137.0 (116.0 - 161.0) | 139.0 (118.0 - 164.0) | 143.0 (122.0 - 165.0) | 0.0068  | 0.0008 | $1.00 \times 10^{-17}$ |
| HDL cholesterol (mg/dL)     | 54.0 (45.0 - 63.0)    | 53.0 (45.0 - 62.0)    | 52.0 (43.0 - 61.0)    | -0.0072 | 0.0007 | $1.05 \times 10^{-24}$ |
| Triglyceride (mg/dL)        | 90.0 (63.0 - 132.0)   | 93.0 (66.0 - 138.0)   | 99.0 (70.0 - 144.0)   | 0.0190  | 0.0016 | $7.31 \times 10^{-31}$ |
| Remnant cholesterol (mg/dL) | 16.0 (11.0 - 23.0)    | 17.0 (12.0 - 24.0)    | 18.0 (12.0 - 25.0)    | 0.0153  | 0.0020 | $2.43 \times 10^{-14}$ |
| Metabolic syndrome (%)      | 25.32% (24,238)       | 26.49% (4852)         | 28.71% (242)          | 0.1051  | 0.0194 | $5.94 \times 10^{-8}$  |
| <i>APOB</i> rs56213756      | CC (82,301)           | CG (22,644)           | GG (1504)             |         |        |                        |
| Total cholesterol (mg/dL)   | 193.0 (171.0 - 217.0) | 194.0 (172.0 - 217.0) | 196.0 (174.0 - 218.0) | 0.0020  | 0.0005 | 0.0001                 |
| LDL cholesterol (mg/dL)     | 119.0 (99.0 - 141.0)  | 120.0 (100.0 - 141.0) | 122.0 (102.0 - 143.0) | 0.0030  | 0.0008 | 0.0001                 |
| Non-HDL cholesterol (mg/dL) | 137.0 (116.0 - 161.0) | 139.0 (117.0 - 163.0) | 142.0 (121.0 - 165.0) | 0.0052  | 0.0007 | $2.54 \times 10^{-14}$ |
| HDL cholesterol (mg/dL)     | 54.0 (45.0 - 63.0)    | 53.0 (45.0 - 63.0)    | 53.0 (44.0 - 62.0)    | -0.0062 | 0.0006 | $2.23 \times 10^{-24}$ |
| Triglyceride (mg/dL)        | 90.0 (63.0 - 132.0)   | 93.0 (66.0 - 137.0)   | 96.0 (69.0 - 142.0)   | 0.0161  | 0.0014 | $1.04 \times 10^{-29}$ |
| Remnant cholesterol (mg/dL) | 16.0 (11.0 - 23.0)    | 17.0 (12.0 - 24.0)    | 17.0 (12.0 - 25.0)    | 0.0167  | 0.0017 | $8.14 \times 10^{-22}$ |
| Metabolic syndrome (%)      | 25.24% (22,436)       | 26.44% (6482)         | 28.01% (458)          | 0.0966  | 0.0168 | $8.96 \times 10^{-9}$  |
| <i>APOB</i> rs1318006       | AA (81,905)           | AG (22,333)           | GG (1470)             |         |        |                        |
| Total cholesterol (mg/dL)   | 193.0 (171.0 - 217.0) | 193.0 (171.0 - 217.0) | 196.0 (174.8 - 219.0) | 0.0019  | 0.0005 | 0.0001                 |
| LDL cholesterol (mg/dL)     | 119.0 (99.0 - 140.0)  | 120.0 (100.0 - 141.0) | 122.5 (102.8 - 143.0) | 0.0030  | 0.0008 | 0.0001                 |
| Non-HDL cholesterol (mg/dL) | 137.0 (116.0 - 161.0) | 139.0 (117.0 - 163.0) | 142.0 (121.0 - 165.0) | 0.0052  | 0.0007 | $6.32 \times 10^{-14}$ |
| HDL cholesterol (mg/dL)     | 54.0 (45.0 - 63.0)    | 53.0 (45.0 - 62.0)    | 53.0 (44.0 - 62.0)    | -0.0064 | 0.0006 | $2.33 \times 10^{-25}$ |
| Triglyceride (mg/dL)        | 90.0 (63.0 - 132.0)   | 93.0 (66.0 - 137.0)   | 96.0 (69.0 - 141.0)   | 0.0161  | 0.0014 | $2.98 \times 10^{-29}$ |
| Remnant cholesterol (mg/dL) | 16.0 (11.0 - 23.0)    | 17.0 (12.0 - 24.0)    | 17.0 (12.0 - 25.0)    | 0.0164  | 0.0017 | $5.21 \times 10^{-21}$ |
| Metabolic syndrome (%)      | 25.24% (22,332)       | 26.45% (6396)         | 27.44% (438)          | 0.0940  | 0.0169 | $2.76 \times 10^{-8}$  |
| <i>APOB</i> rs4665709       | GG (91,312)           | GA (14,119)           | AA (509)              |         |        |                        |
| Total cholesterol (mg/dL)   | 193.0 (171.0 - 217.0) | 193.0 (172.0 - 217.0) | 196.0 (173.0 - 216.5) | 0.0016  | 0.0006 | 0.0133                 |
| LDL cholesterol (mg/dL)     | 119.0 (99.0 - 140.0)  | 120.0 (100.0 - 141.0) | 120.0 (100.0 - 140.5) | 0.0019  | 0.0010 | 0.0441                 |
| Non-HDL cholesterol (mg/dL) | 138.0 (116.0 - 161.0) | 139.0 (117.0 - 163.0) | 142.0 (119.0 - 162.0) | 0.0045  | 0.0009 | $1.86 \times 10^{-7}$  |
| HDL cholesterol (mg/dL)     | 53.0 (45.0 - 63.0)    | 53.0 (44.0 - 62.0)    | 52.0 (44.0 - 61.0)    | -0.0059 | 0.0008 | $1.38 \times 10^{-14}$ |
| Triglyceride (mg/dL)        | 90.0 (63.0 - 133.0)   | 94.0 (66.0 - 138.0)   | 96.0 (69.0 - 146.5)   | 0.0179  | 0.0018 | $2.12 \times 10^{-23}$ |
| Remnant cholesterol (mg/dL) | 16.0 (11.0 - 23.0)    | 17.0 (12.0 - 24.0)    | 17.0 (12.0 - 23.5)    | 0.0182  | 0.0022 | $1.33 \times 10^{-16}$ |
| Metabolic syndrome (%)      | 25.34% (25,002)       | 26.59% (4064)         | 30.53% (167)          | 0.1174  | 0.0212 | $3.24 \times 10^{-8}$  |

Abbreviations and participant recruitment as in Table 2.

#Level was presented as median (interquartile range).

p value: adjusted for sex, age, BMI and current smoking.

**Supplementary Table S3.** Association between *APOB* rs693 genotypes and serum lipid levels and metabolic syndrome.

| <i>APOB</i> rs693            | GG (96,479)           | GA (9777)             | AA (231)              | Beta    | se     | <i>p</i> value         |
|------------------------------|-----------------------|-----------------------|-----------------------|---------|--------|------------------------|
| Total cholesterol# (mg/dL)   | 193.0 (171.0 - 217.0) | 194.0 (172.0 - 219.0) | 199.0 (176.0 - 222.0) | 0.0039  | 0.0008 | $5.53 \times 10^{-7}$  |
| LDL cholesterol# (mg/dL)     | 119.0 (99.0 - 140.0)  | 121.0 (101.0 - 142.0) | 125.0 (104.0 - 143.0) | 0.0066  | 0.0012 | $1.21 \times 10^{-8}$  |
| Non-HDL cholesterol# (mg/dL) | 138.0 (116.0 - 161.0) | 140.0 (118.0 - 164.0) | 143.0 (119.0 - 168.0) | 0.0082  | 0.0010 | $3.52 \times 10^{-15}$ |
| HDL cholesterol# (mg/dL)     | 53.0 (45.0 - 63.0)    | 52.0 (45.0 - 62.0)    | 53.0 (43.0 - 64.0)    | -0.0074 | 0.0009 | $1.47 \times 10^{-15}$ |
| Triglyceride# (mg/dL)        | 90.0 (64.0 - 133.0)   | 94.0 (66.0 - 137.0)   | 92.0 (68.0 - 139.0)   | 0.0160  | 0.0022 | $1.16 \times 10^{-13}$ |
| Remnant cholesterol# (mg/dL) | 16.0 (11.0 - 23.0)    | 17.0 (12.0 - 24.0)    | 17.0 (12.0 - 24.0)    | 0.0170  | 0.0026 | $1.26 \times 10^{-10}$ |
| Metabolic syndrome (%)       | 25.44% (26514)        | 26.49% (2813)         | 22.80% (57)           | 0.0798  | 0.0255 | 0.0018                 |

Abbreviations, participant recruitment and adjustment as in Table 2.

**Supplementary Table S4.** Stepwise linear regression analysis by adding rs693 to other *APOB* variants in Table 3

|                                            | Total cholesterol |        |                |                      | LDL-cholesterol |        |                |                      | Non-HDL-cholesterol |        |                |                      |
|--------------------------------------------|-------------------|--------|----------------|----------------------|-----------------|--------|----------------|----------------------|---------------------|--------|----------------|----------------------|
|                                            | Beta              | se     | R <sup>2</sup> | <i>p</i> value       | Beta            | se     | R <sup>2</sup> | <i>p</i> value       | Beta                | se     | R <sup>2</sup> | <i>p</i> value       |
| Age (years)                                | 0.0013            | 0.0000 | 0.0340         | < 10 <sup>-307</sup> | 0.0014          | 0.0000 | 0.0168         | < 10 <sup>-307</sup> | 0.0019              | 0.0000 | 0.0352         | < 10 <sup>-307</sup> |
| Sex (male vs. female)                      | 0.0140            | 0.0005 | 0.0047         | 1.83E-171            | -               | -      | -              | -                    | -0.0052             | 0.0008 | 0.0007         | 4.22E-12             |
| Body mass index (kg/m <sup>2</sup> )       | 0.0016            | 0.0001 | 0.0053         | 1.23E-134            | 0.0050          | 0.0001 | 0.0258         | < 10 <sup>-307</sup> | 0.0061              | 0.0001 | 0.0485         | < 10 <sup>-307</sup> |
| Current smoking (%)                        | -                 | -      | -              | -                    | -0.0028         | 0.0009 | 0.0204         | 1.51E-03             | 0.0031              | 0.0009 | 0.0001         | 6.31E-04             |
| <i>APOB</i> rs693 (GG vs. GA vs. AA)       | -                 | -      | -              | -                    | -               | -      | -              | -                    | -                   | -      | -              | -                    |
| <i>APOB</i> rs144467873 (GG vs. GA vs. AA) | 0.0754            | 0.0041 | 0.0034         | 9.42E-77             | 0.1290          | 0.0061 | 0.0303         | 5.56E-100            | -0.0134             | 0.0006 | 0.0045         | 4.97E-97             |
| <i>APOB</i> rs13306194 (GG vs. GA vs. AA)  | -0.0093           | 0.0005 | 0.0041         | 2.38E-86             | -0.0128         | 0.0007 | 0.0203         | 9.11E-74             | 0.1072              | 0.0055 | 0.0036         | 6.50E-85             |
| <i>APOB</i> rs1367117 (GG vs. GA vs. AA)   | 0.0047            | 0.0005 | 0.0008         | 1.65E-21             | 0.0075          | 0.0007 | 0.0312         | 2.96E-24             | 0.0072              | 0.0007 | 0.0010         | 3.40E-27             |
|                                            | HDL-cholesterol   |        |                |                      | Triglyceride    |        |                |                      | Remnant cholesterol |        |                |                      |
|                                            | Beta              | se     | R <sup>2</sup> | <i>p</i> value       | Beta            | se     | R <sup>2</sup> | <i>p</i> value       | Beta                | se     | R <sup>2</sup> | <i>p</i> value       |
| Age (years)                                | 0.0001            | 0.0000 | 0.0002         | 8.90E-09             | 0.0030          | 0.0001 | 0.0194         | < 10 <sup>-307</sup> | 0.0050              | 0.0001 | 0.0419         | < 10 <sup>-307</sup> |
| Sex (male vs. female)                      | 0.0626            | 0.0007 | 0.0869         | < 10 <sup>-307</sup> | -0.0568         | 0.0016 | 0.0200         | 1.20E-288            | -0.0150             | 0.0019 | 0.0005         | 4.57E-15             |
| Body mass index (kg/m <sup>2</sup> )       | -0.0094           | 0.0001 | 0.1645         | < 10 <sup>-307</sup> | 0.0221          | 0.0002 | 0.1504         | < 10 <sup>-307</sup> | 0.0099              | 0.0002 | 0.0230         | < 10 <sup>-307</sup> |
| Current smoking (%)                        | -0.0109           | 0.0008 | 0.0013         | 4.91E-43             | 0.0408          | 0.0019 | 0.0036         | 9.95E-106            | 0.0316              | 0.0023 | 0.0033         | 1.00E-43             |
| <i>APOB</i> rs693 (GG vs. GA vs. AA)       | -0.0030           | 0.0011 | 0.0000         | 5.67E-03             | -               | -      | -              | -                    | -                   | -      | -              | -                    |
| <i>APOB</i> rs1318006 (AA vs. AG vs. GG)   | -0.0053           | 0.0007 | 0.0008         | 1.93E-13             |                 |        |                |                      |                     |        |                |                      |
| <i>APOB</i> rs35131127 (TT vs. TC vs. CC)  |                   |        |                |                      | 0.0169          | 0.0016 | 0.0010         | 1.24E-24             |                     |        |                |                      |
| <i>APOB</i> rs13306194 (GG vs. GA vs. AA)  |                   |        |                |                      | -0.0126         | 0.0013 | 0.0007         | 1.03E-21             | -0.0147             | 0.0016 | 0.0009         | 5.33E-20             |
| <i>APOB</i> rs144467873 (GG vs. GA vs. AA) |                   |        |                |                      |                 |        |                |                      | -0.0974             | 0.0140 | 0.0004         | 4.08E-12             |
| <i>APOB</i> rs56213756 (CC vs. CG vs. GG)  |                   |        |                |                      |                 |        |                |                      | 0.0147              | 0.0017 | 0.0006         | 2.76E-17             |

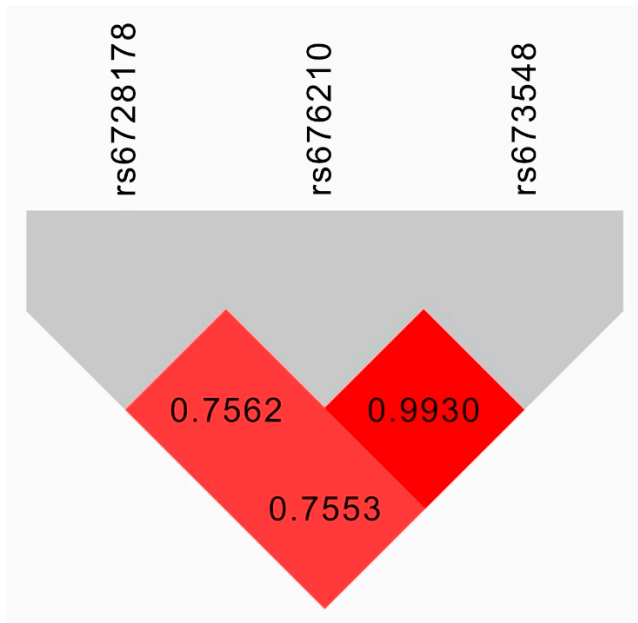

**Supplementary Figure S2.** Linkage disequilibrium maps for the *APOB* gene rs6728178, rs676210 and rs673548 variants.

**Supplementary Table S5.** Association between three *APOB* variants rs676210, rs673548, and rs6728178 genotypes and LDL cholesterol levels and the risk of metabolic syndrome in Taiwan Biobank participants.

| Chr | SNPs      | Position(GRCh37) | Ref/Alt | LDL cholesterol (mg/dL) |        |                        | metabolic syndrome |                 |                |
|-----|-----------|------------------|---------|-------------------------|--------|------------------------|--------------------|-----------------|----------------|
|     |           |                  |         | Beta                    | se     | <i>p</i> value         | OR                 | 95% CI          | <i>p</i> value |
| 2   | rs676210  | 21231524         | G/A     | -0.0063                 | 0.0006 | $4.10 \times 10^{-30}$ | 1.0214             | 0.9968 - 1.0466 | 0.0891         |
| 2   | rs673548  | 21237544         | G/A     | -0.0063                 | 0.0006 | $7.47 \times 10^{-30}$ | 1.0221             | 0.9975 - 1.0473 | 0.0785         |
| 2   | rs6728178 | 21193946         | G/A     | -0.0052                 | 0.0006 | $5.32 \times 10^{-21}$ | 1.0214             | 0.9971 - 1.0463 | 0.0850         |

Participant recruitment for analysis is shown in Fig. 1

*p* value: adjusted for sex, age, BMI and current smoking.

Abbreviation as in Table 4 and Supplementary Table 1.



**Supplementary Table S6.** Association between *APOB* rs4665709 genotypes and clinical and laboratory parameters in Taiwan Biobank participants.

| Clinical and laboratory parameters         | Beta    | se     | <i>p</i> value         |
|--------------------------------------------|---------|--------|------------------------|
| Anthropology                               |         |        |                        |
| Age (years)                                | 0.0264  | 0.0887 | 0.7656                 |
| Waist circumference (cm)                   | 0.0013  | 0.0412 | 0.9754                 |
| Waist-hip ratio                            | 0.0001  | 0.0004 | 0.9058                 |
| Body mass index (kg/m <sup>2</sup> )       | -0.0372 | 0.0301 | 0.2168                 |
| Blood Pressure status                      |         |        |                        |
| Systolic BP* (mmHg)                        | 0.0823  | 0.1242 | 0.5076                 |
| Diastolic BP* (mmHg)                       | 0.1278  | 0.0812 | 0.1156                 |
| Mean BP* (mmHg)                            | 0.1126  | 0.0893 | 0.2071                 |
| Lipid profile                              |         |        |                        |
| Total cholesterol# (mg/dL)                 | 0.0016  | 0.0006 | 0.0133                 |
| LDL cholesterol# (mg/dL)                   | 0.0019  | 0.0010 | 0.0441                 |
| Non-HDL cholesterol# (mg/dL)               | 0.0045  | 0.0009 | $1.86 \times 10^{-7}$  |
| HDL cholesterol# (mg/dL)                   | -0.0059 | 0.0008 | $1.38 \times 10^{-14}$ |
| Triglyceride# (mg/dL)                      | 0.0179  | 0.0018 | $2.12 \times 10^{-23}$ |
| Remnant cholesterol# (mg/dL)               | 0.0182  | 0.0022 | $1.33 \times 10^{-16}$ |
| Glucose metabolism                         |         |        |                        |
| Fasting plasma glucose** (mg/dL)           | 0.0560  | 0.1212 | 0.6438                 |
| HbA1c** (%)                                | 0.0039  | 0.0048 | 0.4188                 |
| Uric acid                                  |         |        |                        |
| Uric acid*** (mg/dL)                       | -0.0107 | 0.0090 | 0.2369                 |
| Renal function                             |         |        |                        |
| Creatinine (mg/dL)                         | -0.0062 | 0.0023 | 0.0061                 |
| eGFR (mL/min/1.73 m <sup>2</sup> )         | 0.3880  | 0.1755 | 0.0271                 |
| BUN (mg/dL)                                | -0.0387 | 0.0294 | 0.1883                 |
| Liver function                             |         |        |                        |
| AST (U/L)                                  | 0.0349  | 0.0989 | 0.7243                 |
| ALT (U/L)                                  | 0.0417  | 0.1611 | 0.7958                 |
| γGT (U/L)                                  | 0.2710  | 0.2583 | 0.2940                 |
| Serum albumin (g/dL)                       | -0.0012 | 0.0018 | 0.4915                 |
| Total bilirubin (mg/dL)                    | 0.0006  | 0.0022 | 0.7839                 |
| Hematological parameters                   |         |        |                        |
| Leukocyte count (10 <sup>3</sup> /μL)      | 0.5855  | 0.2419 | 0.0155                 |
| Hematocrit (%)                             | -0.0239 | 0.0279 | 0.3928                 |
| Platelet count (10 <sup>3</sup> /μL)       | -0.1803 | 0.4734 | 0.7033                 |
| Red blood cell count (10 <sup>6</sup> /μL) | -0.0010 | 0.0037 | 0.7745                 |
| Hemoglobin (g/dL)                          | 0.0060  | 0.0101 | 0.5543                 |
| Atherosclerotic risk factors               |         |        |                        |
| Diabetes mellitus (%)                      | 0.0677  | 0.0288 | 0.0187                 |
| Hypertension (%)                           | -0.0022 | 0.0218 | 0.9194                 |
| Current smoking (%)                        | -0.0366 | 0.0232 | 0.1148                 |
| Gout (%)                                   | -0.0004 | 0.0437 | 0.9919                 |
| Microalbuminuria (%)                       | 0.0002  | 0.0262 | 0.9949                 |
| Metabolic syndrome (%)                     | 0.1174  | 0.0212 | $3.24 \times 10^{-8}$  |

Abbreviations: AST: aspartate aminotransferase, ALT: alanine aminotransferase, γGT: γ-glutamyl transferase, eGFR: estimated glomerular filtration rate, BUN: blood urine nitrogen, HbA1c: hemoglobin A1C, BP: blood pressure.

Other abbreviations as in Table 1. Participants were analyzed after the exclusion of those with a history of \*hypertension, \*\*diabetes mellitus, \*\*\*gout, and #hyperlipidemia. *p* value: adjusted for sex, age, BMI and current smoking.

**Supplementary Table S7.** Association between *APOB* rs144467873 genotypes and clinical and laboratory parameters in Taiwan Biobank participants.

| Clinical and laboratory parameters         | Beta    | se     | p value                 |
|--------------------------------------------|---------|--------|-------------------------|
| Anthropology                               |         |        |                         |
| Age (years)                                | -0.1601 | 0.5193 | 0.7579                  |
| Waist circumference (cm)                   | 0.0376  | 0.2411 | 0.8760                  |
| Waist-hip ratio                            | 0.0017  | 0.0025 | 0.5015                  |
| Body mass index (kg/m <sup>2</sup> )       | -0.2928 | 0.1762 | 0.0966                  |
| Blood Pressure status                      |         |        |                         |
| Systolic BP* (mmHg)                        | -0.0999 | 0.7201 | 0.8897                  |
| Diastolic BP* (mmHg)                       | -0.8174 | 0.4710 | 0.0826                  |
| Mean BP* (mmHg)                            | -0.5785 | 0.5177 | 0.2638                  |
| Lipid profile                              |         |        |                         |
| Total cholesterol# (mg/dL)                 | 0.0805  | 0.0041 | $2.29 \times 10^{-85}$  |
| LDL cholesterol# (mg/dL)                   | 0.1373  | 0.0061 | $1.96 \times 10^{-110}$ |
| Non-HDL cholesterol# (mg/dL)               | 0.1148  | 0.0055 | $6.08 \times 10^{-95}$  |
| HDL cholesterol# (mg/dL)                   | -0.0124 | 0.0049 | 0.0114                  |
| Triglyceride# (mg/dL)                      | -0.0077 | 0.0115 | 0.5037                  |
| Remnant cholesterol# (mg/dL)               | -0.1005 | 0.0142 | $1.71 \times 10^{-12}$  |
| Glucose metabolism                         |         |        |                         |
| Fasting plasma glucose** (mg/dL)           | -0.6737 | 0.7071 | 0.3407                  |
| HbA1c** (%)                                | -0.0015 | 0.0282 | 0.9562                  |
| Uric acid                                  |         |        |                         |
| Uric acid*** (mg/dL)                       | 0.0080  | 0.0529 | 0.8793                  |
| Renal function                             |         |        |                         |
| Creatinine (mg/dL)                         | -0.0108 | 0.0132 | 0.4135                  |
| eGFR (mL/min/1.73 m <sup>2</sup> )         | 1.0942  | 1.0283 | 0.2873                  |
| BUN (mg/dL)                                | -0.3357 | 0.1725 | 0.0517                  |
| Liver function                             |         |        |                         |
| AST (U/L)                                  | -0.1482 | 0.5780 | 0.7977                  |
| ALT (U/L)                                  | 0.0103  | 0.9424 | 0.9913                  |
| $\gamma$ GT (U/L)                          | -1.9279 | 1.5212 | 0.2050                  |
| Serum albumin (g/dL)                       | -0.0183 | 0.0106 | 0.0856                  |
| Total bilirubin (mg/dL)                    | -0.0223 | 0.0130 | 0.0855                  |
| Hematological parameters                   |         |        |                         |
| Leukocyte count (10 <sup>3</sup> /μL)      | -0.1318 | 1.4123 | 0.9256                  |
| Hematocrit (%)                             | -0.2059 | 0.1635 | 0.2079                  |
| Platelet count (10 <sup>3</sup> /μL)       | -0.3013 | 2.7717 | 0.9134                  |
| Red blood cell count (10 <sup>6</sup> /μL) | -0.0088 | 0.0214 | 0.6812                  |
| Hemoglobin (g/dL)                          | -0.0686 | 0.0592 | 0.2468                  |
| Atherosclerotic risk factors               |         |        |                         |
| Diabetes mellitus (%)                      | 0.0775  | 0.1711 | 0.6507                  |
| Hypertension (%)                           | -0.0181 | 0.1289 | 0.8884                  |
| Current smoking (%)                        | -0.1831 | 0.1376 | 0.1835                  |
| Gout (%)                                   | 0.0374  | 0.2519 | 0.8821                  |
| Microalbuminuria (%)                       | -0.0811 | 0.1611 | 0.6148                  |
| Metabolic syndrome (%)                     | 0.6463  | 0.1161 | $2.58 \times 10^{-8}$   |

Abbreviations, participant recruitment and adjustment as in Supplementary Table 6.

**Supplementary Table S8.** F-statistics for *APOB* variants.

| Chr | Gene                     | SNP         | position | Allele | MAF    | HWE     | beta    | SE     | <i>P</i> value*         | F-statistic | R <sup>2</sup> |
|-----|--------------------------|-------------|----------|--------|--------|---------|---------|--------|-------------------------|-------------|----------------|
| 2   | <i>APOB</i>              | rs144467873 | 21229161 | G/A    | 0.0019 | 0.2916  | 0.1373  | 0.0061 | $1.96 \times 10^{-110}$ | 1071.5      | 0.0470         |
| 2   | <i>APOB</i>              | rs13306194  | 21252534 | G/A    | 0.1425 | 0.04943 | -0.0140 | 0.0007 | $5.13 \times 10^{-89}$  | 1039.5      | 0.0463         |
| 2   | <i>APOB</i>              | rs1367117   | 21263900 | G/A    | 0.1320 | 0.8006  | 0.0109  | 0.0007 | $5.52 \times 10^{-50}$  | 1015.0      | 0.0446         |
|     | WGRS_ <i>APOB</i> _3SNPs |             |          |        |        |         | 0.8796  | 0.0277 | $5.81 \times 10^{-221}$ | 1160.3      | 0.0517         |
|     | WGRS_ <i>APOB</i> _2SNPs |             |          |        |        |         | 0.8805  | 0.0375 | $9.08 \times 10^{-122}$ | 1070.2      | 0.0476         |

\*LDL-C adjusted for sex, age, body mass index and current smoking
